# Supplementary material for: Associations of Broader Parental Factors with Children’s Happiness and Weight Status through Child Food Intake, Physical Activity, and Screen Time: A Longitudinal Modeling Analysis of South Korean Families
Source: MDPI journal article supplement (doi:10.3390/ijerph21020176), 2024-02-03
Supplement: s1 [file s1]

Supplementary S1. Correlations among the Variables.

|    | 1    | 2    | 3    | 4    | 5    | 6    | 7    | 8    | 9    | 10   | 11   | 12   | 13   | 14   | 15   | 16   | 17   | 18   | 19   | 20   | 21   | 22   | 23   | 24   | 25   | 26   | 27   | 28  | 29  |
|----|------|------|------|------|------|------|------|------|------|------|------|------|------|------|------|------|------|------|------|------|------|------|------|------|------|------|------|-----|-----|
| 2  | .87  | 1    |      |      |      |      |      |      |      |      |      |      |      |      |      |      |      |      |      |      |      |      |      |      |      |      |      |     |     |
| 3  | .73  | .74  | 1    |      |      |      |      |      |      |      |      |      |      |      |      |      |      |      |      |      |      |      |      |      |      |      |      |     |     |
| 4  | .44  | .43  | .33  | 1    |      |      |      |      |      |      |      |      |      |      |      |      |      |      |      |      |      |      |      |      |      |      |      |     |     |
| 5  | .43  | .42  | .33  | .88  | 1    |      |      |      |      |      |      |      |      |      |      |      |      |      |      |      |      |      |      |      |      |      |      |     |     |
| 6  | .35  | .36  | .29  | .72  | .74  | 1    |      |      |      |      |      |      |      |      |      |      |      |      |      |      |      |      |      |      |      |      |      |     |     |
| 7  | -.43 | -.43 | -.43 | -.24 | -.24 | -.22 | 1    |      |      |      |      |      |      |      |      |      |      |      |      |      |      |      |      |      |      |      |      |     |     |
| 8  | -.42 | -.43 | -.43 | -.23 | -.23 | -.22 | .84  | 1    |      |      |      |      |      |      |      |      |      |      |      |      |      |      |      |      |      |      |      |     |     |
| 9  | -.41 | -.41 | -.41 | -.23 | -.21 | -.19 | .66  | .68  | 1    |      |      |      |      |      |      |      |      |      |      |      |      |      |      |      |      |      |      |     |     |
| 10 | -.29 | -.30 | -.22 | -.47 | -.44 | -.43 | .30  | .30  | .28  | 1    |      |      |      |      |      |      |      |      |      |      |      |      |      |      |      |      |      |     |     |
| 11 | -.30 | -.31 | -.23 | -.49 | -.47 | -.43 | .31  | .32  | .30  | .80  | 1    |      |      |      |      |      |      |      |      |      |      |      |      |      |      |      |      |     |     |
| 12 | -.28 | -.29 | -.23 | -.42 | -.41 | -.39 | .29  | .27  | .31  | .64  | .65  | 1    |      |      |      |      |      |      |      |      |      |      |      |      |      |      |      |     |     |
| 13 | .17  | .17  | .18  | .13  | .12  | .13  | -.18 | -.21 | -.19 | -.11 | -.13 | -.10 | 1    |      |      |      |      |      |      |      |      |      |      |      |      |      |      |     |     |
| 14 | .18  | .18  | .19  | .11  | .11  | .12  | -.13 | -.16 | -.15 | -.09 | -.08 | -.09 | .41  | 1    |      |      |      |      |      |      |      |      |      |      |      |      |      |     |     |
| 15 | .17  | .19  | .16  | .13  | .11  | .12  | -.18 | -.19 | -.17 | -.13 | -.12 | -.12 | .45  | .50  | 1    |      |      |      |      |      |      |      |      |      |      |      |      |     |     |
| 16 | .13  | .14  | .15  | .10  | .10  | .11  | -.15 | -.17 | -.13 | -.07 | -.06 | -.06 | .45  | .55  | .50  | 1    |      |      |      |      |      |      |      |      |      |      |      |     |     |
| 17 | .16  | .16  | .14  | .21  | .20  | .19  | -.13 | -.14 | -.11 | -.18 | -.19 | -.13 | .19  | .17  | .20  | .21  | 1    |      |      |      |      |      |      |      |      |      |      |     |     |
| 18 | .13  | .14  | .12  | .21  | .21  | .18  | -.14 | -.13 | -.12 | -.17 | -.17 | -.16 | .08  | .22  | .18  | .16  | .50  | 1    |      |      |      |      |      |      |      |      |      |     |     |
| 19 | .14  | .17  | .12  | .22  | .24  | .23  | -.16 | -.15 | -.11 | -.21 | -.21 | -.19 | .12  | .14  | .20  | .17  | .53  | .56  | 1    |      |      |      |      |      |      |      |      |     |     |
| 20 | .14  | .15  | .12  | .20  | .19  | .19  | -.12 | -.12 | -.10 | -.14 | -.15 | -.09 | .08  | .16  | .15  | .21  | .54  | .60  | .55  | 1    |      |      |      |      |      |      |      |     |     |
| 21 | .11  | .12  | .09  | .09  | .08  | .05  | -.17 | -.19 | -.14 | -.07 | -.09 | -.09 | .14  | .08  | .14  | .08  | .03  | .07  | .09  | .03  | 1    |      |      |      |      |      |      |     |     |
| 22 | -.02 | -.02 | -.03 | .04  | .02  | .02  | .02  | .01  | .04  | -.01 | .01  | -.01 | -.03 | -.01 | -.03 | -.04 | -.03 | .03  | -.01 | .00  | .14  | 1    |      |      |      |      |      |     |     |
| 23 | .00  | -.01 | -.02 | .01  | .05  | .05  | -.03 | -.04 | -.01 | -.03 | -.04 | .00  | .08  | .07  | .08  | .10  | .03  | .06  | .06  | .05  | .09  | .06  | 1    |      |      |      |      |     |     |
| 24 | -.20 | -.22 | -.14 | -.16 | -.16 | -.10 | .13  | .13  | .14  | .13  | .12  | .09  | -.11 | -.09 | -.11 | -.04 | -.09 | -.07 | -.10 | -.06 | -.12 | .09  | -.05 | 1    |      |      |      |     |     |
| 25 | .00  | .00  | .02  | .00  | -.03 | .01  | .00  | .01  | .04  | .04  | .06  | .00  | .00  | .01  | -.03 | .00  | -.05 | -.08 | -.09 | -.02 | .01  | .04  | -.01 | .11  | 1    |      |      |     |     |
| 26 | .03  | .02  | .03  | .02  | .00  | .00  | .00  | .00  | .04  | .01  | .05  | -.02 | .00  | .00  | .00  | .03  | -.08 | -.09 | -.08 | -.03 | .03  | .06  | .03  | .14  | .88  | 1    |      |     |     |
| 27 | -.01 | -.02 | -.01 | -.01 | -.03 | -.01 | .00  | .01  | .06  | .05  | .07  | .02  | -.02 | -.02 | -.02 | .00  | -.08 | -.11 | -.08 | -.04 | .02  | .06  | .05  | .14  | .83  | .90  | 1    |     |     |
| 28 | .05  | .05  | .05  | .05  | .05  | .04  | -.04 | -.07 | -.05 | -.07 | -.06 | -.05 | .06  | .04  | .08  | -.01 | .06  | .08  | .06  | .03  | .02  | -.01 | -.02 | -.13 | -.03 | -.01 | -.02 | 1   |     |
| 29 | .09  | .10  | .09  | .05  | .04  | .04  | -.11 | -.10 | -.12 | -.08 | -.08 | -.07 | .06  | .02  | .04  | .00  | .04  | .05  | .07  | .01  | .07  | -.04 | -.02 | -.18 | -.05 | -.05 | -.05 | .34 | 1   |
| 30 | .10  | .10  | .09  | .09  | .08  | .06  | -.11 | -.11 | -.13 | -.10 | -.08 | -.07 | .06  | .02  | .06  | .01  | .05  | .02  | .03  | .01  | .05  | .00  | .00  | -.16 | -.04 | -.05 | -.06 | .26 | .45 |

Note. Red indicates a significant positive correlation. Blue indicates a significant negative correlation.

- [1] Mother's happiness - In general, I consider myself happy;
- [2] Mother's happiness - Compared with most of my peers, I consider myself happy;
- [3] Mother's happiness - I enjoy life regardless of what is going on;
- [4] Father's happiness - In general, I consider myself happy;
- [5] Father's happiness - Compared with most of my peers, I consider myself happy;
- [6] Father's happiness - I enjoy life regardless of what is going on;
- [7] Mother's parenting stress – I am not sure if I could be a good parent;
- [8] Mother's parenting stress – I am not confident that I can raise my child properly;
- [9] Mother's parenting stress – I feel my child is behind his/her peers because I do not parent him/her well;
- [10] Father's parenting stress – I am not sure if I could be a good parent;
- [11] Father's parenting stress – I am not confident that I can raise my child properly;
- [12] Father's parenting stress – I feel my child is behind his/her peers because I do not parent him/her well;
- [13] Mother's play engagement – I do arts and crafts with my child;
- [14] Mother's play engagement – My child and I play board games and do puzzles together;

- [15] Mother's play engagement - My child and I talk about nature and do science projects together;
- [16] Mother's play engagement - My child and I build something or play with toys together;
- [17] Father's play engagement - I do arts and crafts with my child;
- [18] Father's play engagement - My child and I play board games and do puzzles together;
- [19] Father's play engagement - My child and I talk about nature and do science projects together;
- [20] Father's play engagement - My child and I build something or play with toys together;
- [21] Child healthy eating;
- [22] Child unhealthy eating;
- [23] Child physical activities;
- [24] Child screen time;
- [25] Child weight status at age 7;
- [26] Child weight status at age 8;
- [27] Child weight status at age 9;
- [28] Child happiness at age 7;
- [29] Child happiness at age 8;
- [30] Child happiness at age 9.

\* $p < .05$
